# Supplementary material for: Gene correction of HBB mutations in CD34+ hematopoietic stem cells using Cas9 mRNA and ssODN donors
Source: PubMed Central journal article supplement (PMC6236008; doi:10.1186/s40348-018-0086-1), 2018-11-14

Figure S1

A

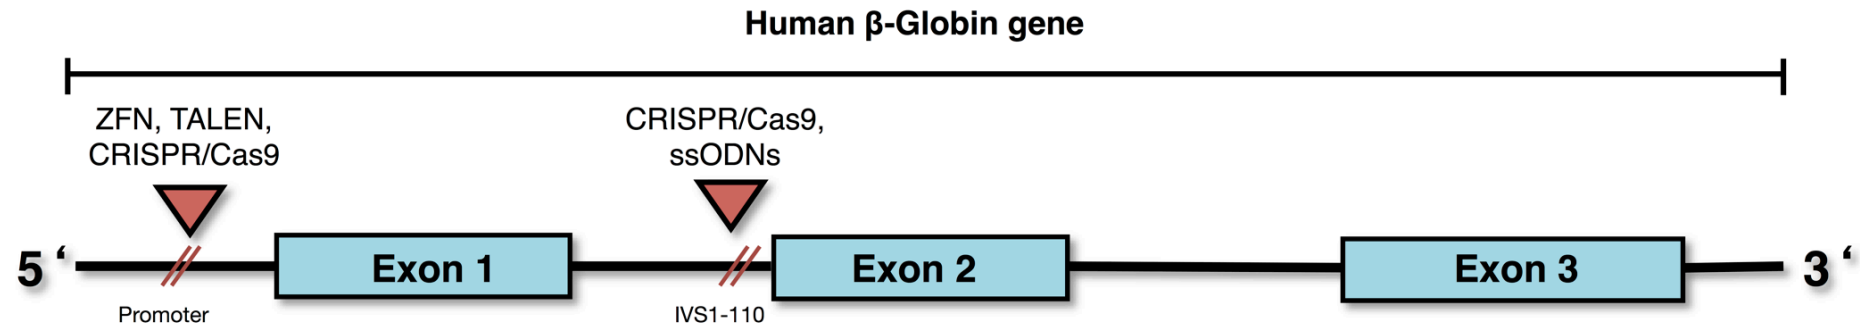

B

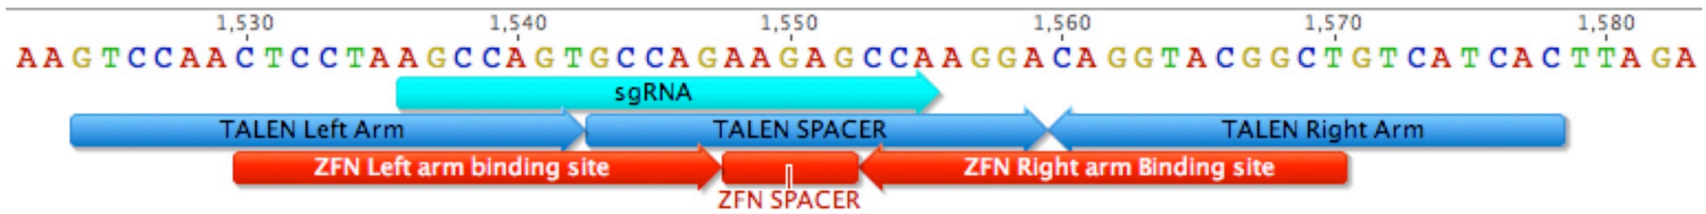

**Figure S2**

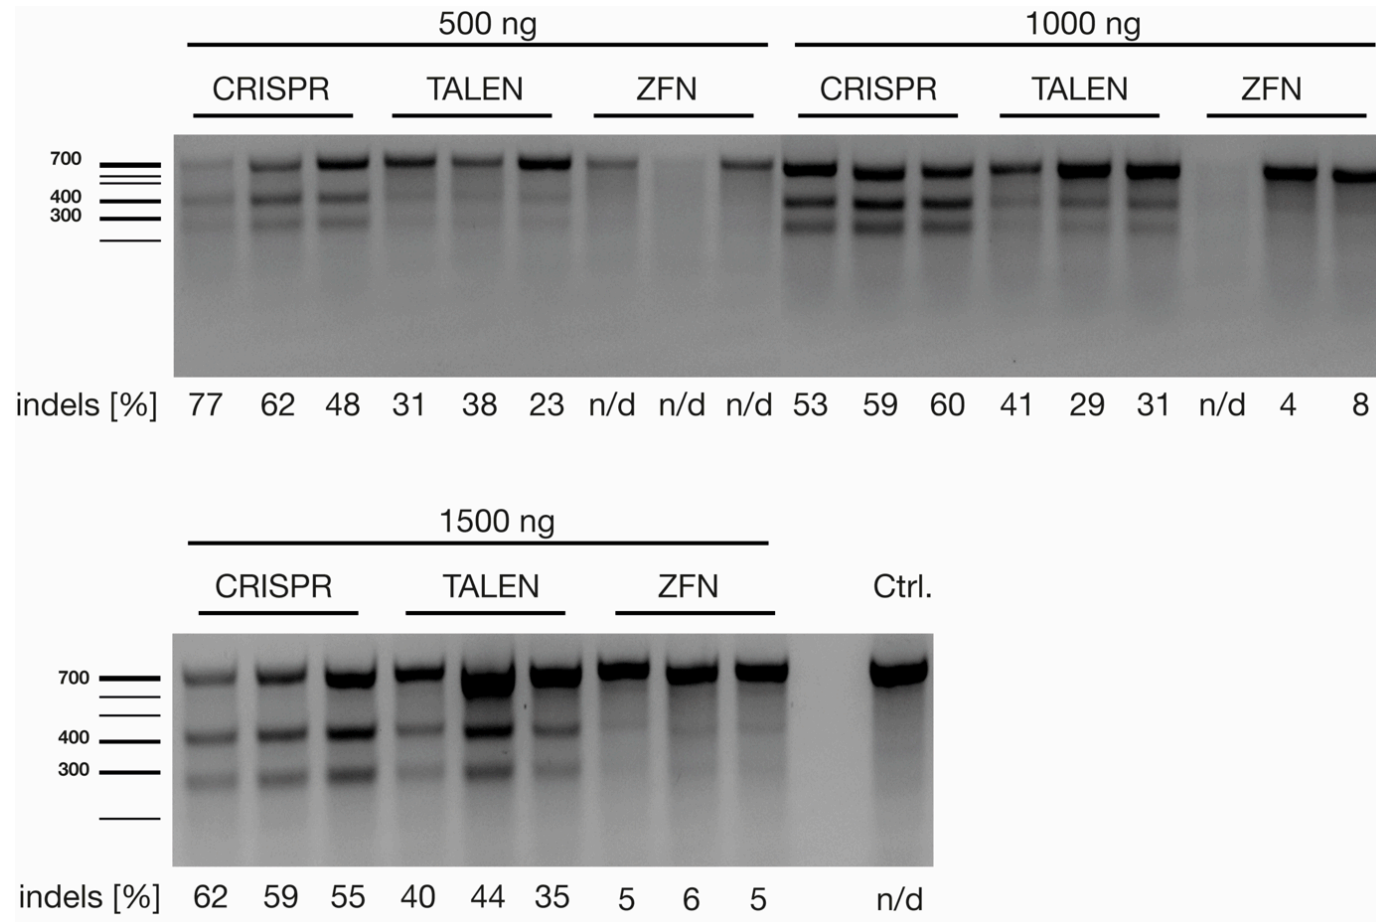

Figure S3

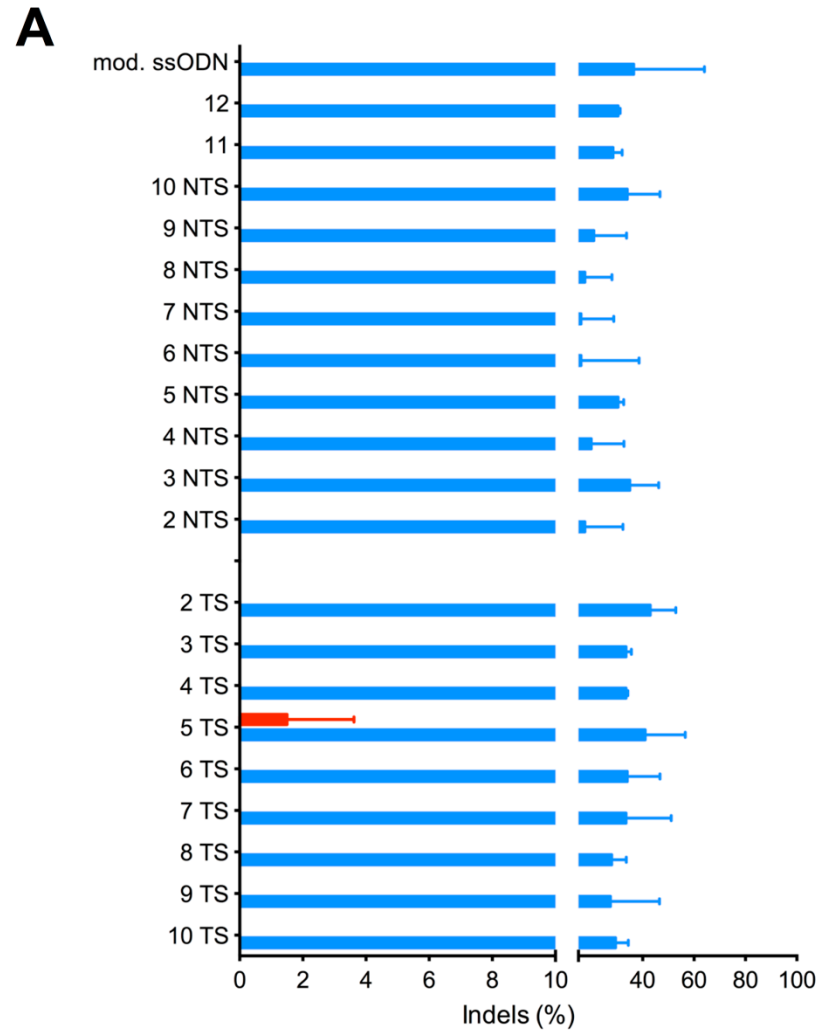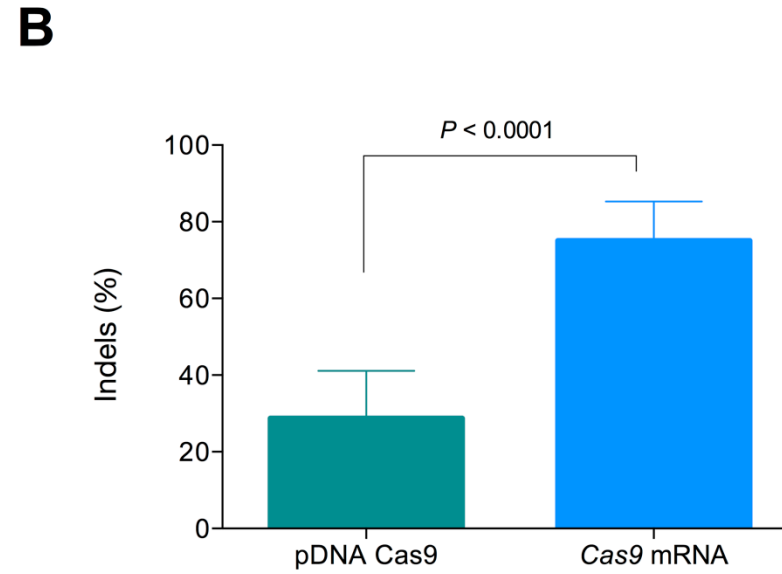

Figure S4

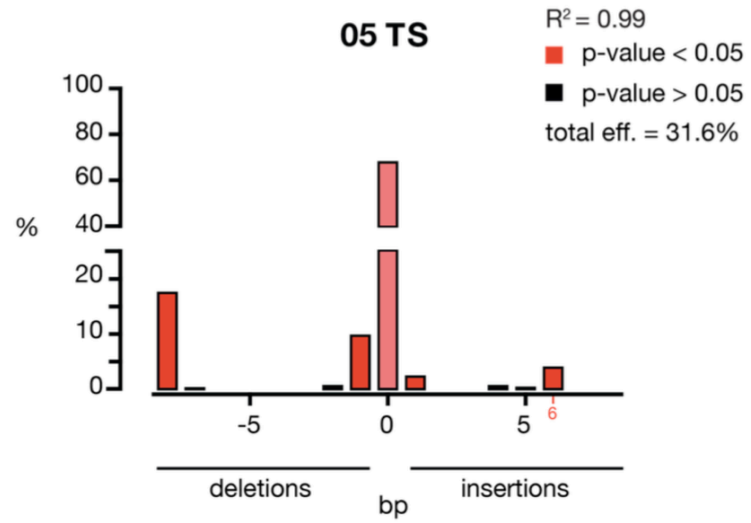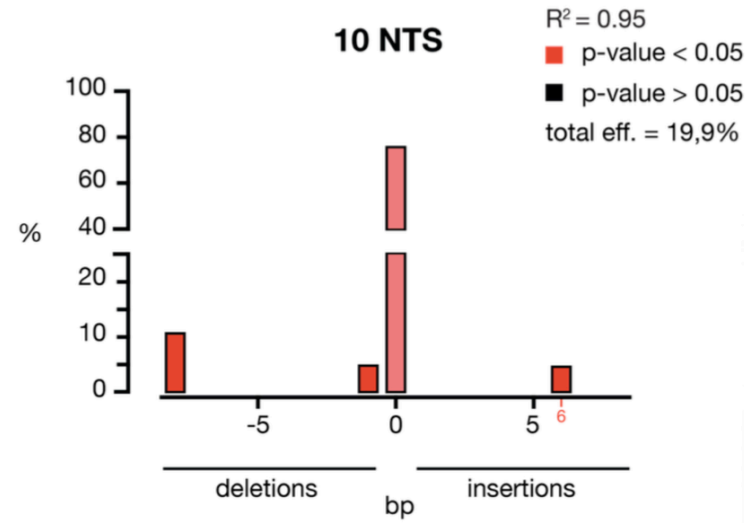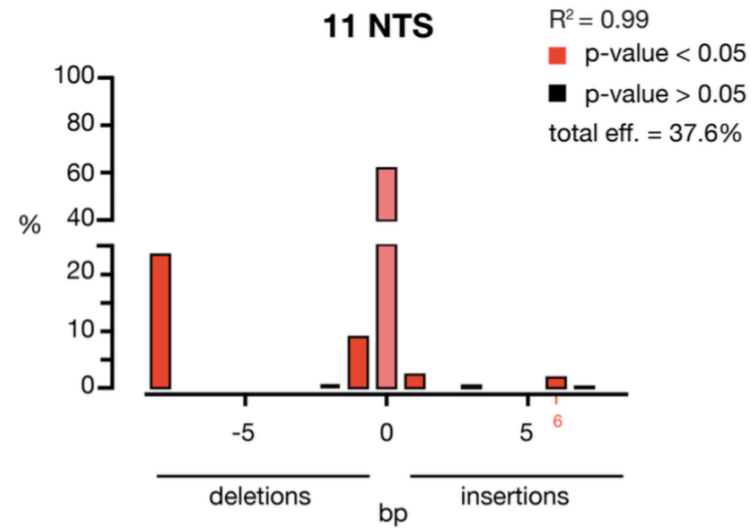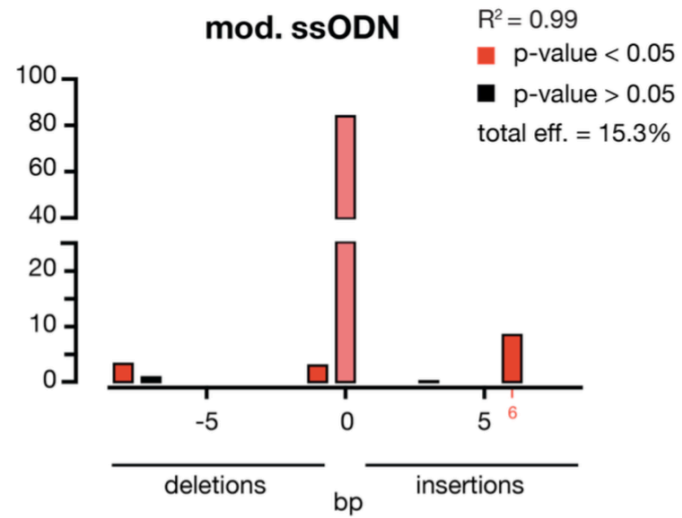

Figure S5

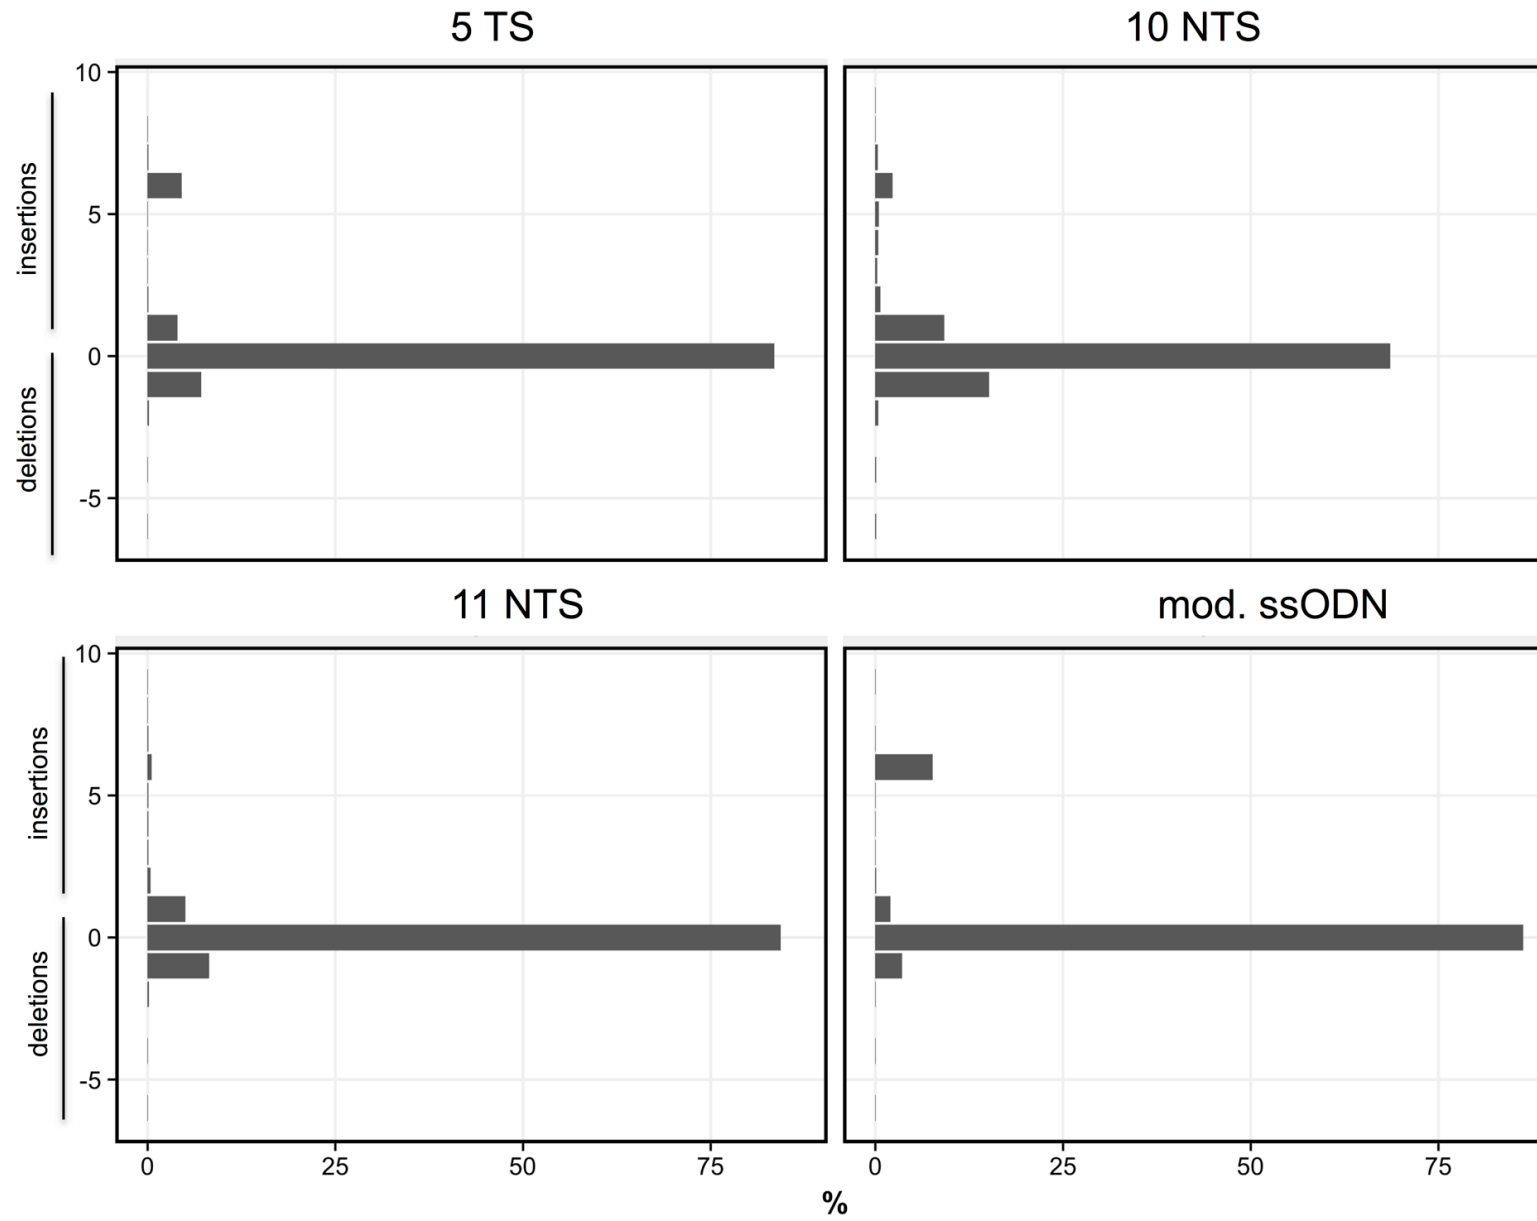

Figure S6

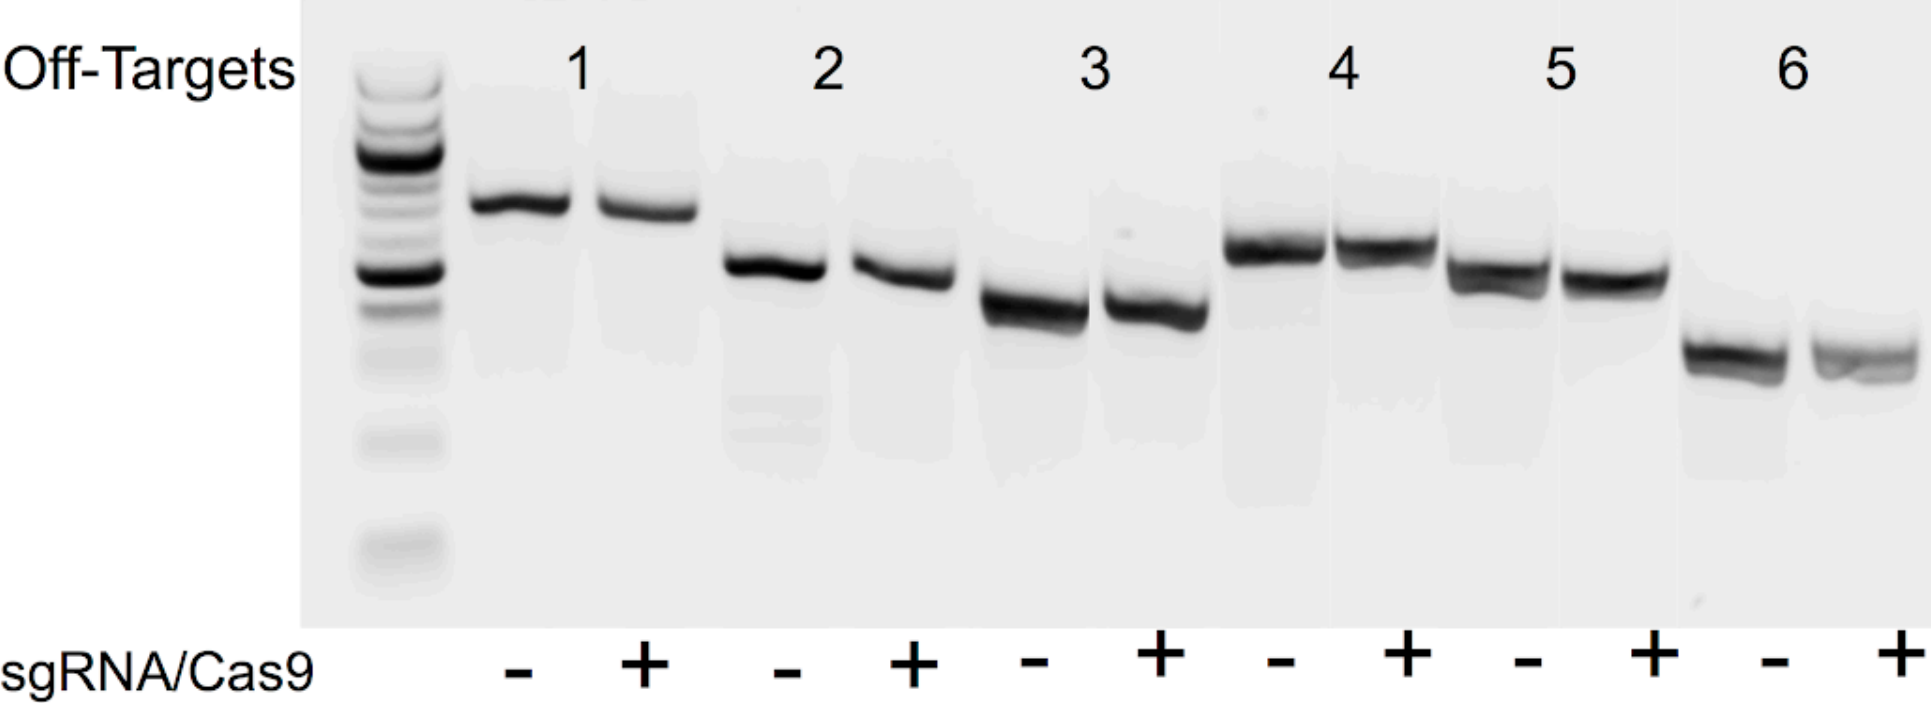

Supplement: 40348_2018_86_MOESM1_ESM.pdf [file 40348_2018_86_MOESM1_ESM.pdf]
