# Supplementary material for: Gene correction of HBB mutations in CD34+ hematopoietic stem cells using Cas9 mRNA and ssODN donors
Source: PubMed Central journal article supplement (PMC6236008; doi:10.1186/s40348-018-0086-1), 2018-11-14
Supplement: 40348_2018_86_MOESM2_ESM.pdf [file 40348_2018_86_MOESM2_ESM.pdf]

**Additional file 2**

**Data S1 The complete amino acid sequences of the *HBB* targeting ZFNs.**

>HBB\_ZFN Left Arm

MDYKDHDGDYKDHDIDYKDDDDKMAPKKKRKVGIHGVPAAAMAERPFQCRICMRNFSRSDN  
 LSAHIRTHTGEKPFACDICGRKFARSDNRTTHTKIHTGSQKPFQCRICMRNFSQSSDLR  
 HIRTHTGEKPFACDICGRKFARRDALLMHTKIHTGSQKPFQCRICMRNFSQSGDLTRHIR  
 THTGEKPFACDICGRKFARRDQLPQHTKIHLRGIPAGEERAGGEEVRAAAQAEVRAPRVH  
 RADRDREQHPGPHPGDEGDGVLHEGVRLQKAPGRKQKAMKVMEFFMKVYGYRGKHLGG  
 SRKPDGAIYTVGSPIDYGVIVDTKAYSGGYNLPIGQADEMERYVEENQTRDKHLNPNNEW  
 KVPSSVTEFKFLFVSGHFKGNYKAQLTRLNHNITCNGAVLSVEELLIGGEMIKAGTLTL  
 EEVRRKFNNGEINFRS\*

>HBB\_ZFN Right Arm

MDYKDHDGDYKDHDIDYKDDDDKMAPKKKRKVGIHGVPAAAMAERPFQCRICMRNFSQSSD  
 LSRHIRTHTGEKPFACDICGRKFARATSCTSIPRYTRAAKSPSSVESACVTSVCATTMRN  
 FSLRHHLTRHIRTHTGEKPFACDICGRKFAQSGTRKTHTKIHTGSQKPFQCRICMRNFSR  
 SDHLSQHIRTHTGEKPFACDICGRKFAQKATRITHTKIHLRGSQLVKSELEEKSELRHK  
 LKYVPHEYIELIEIARNSTQDRILEMKVMEFFMKVYGYRGKHLGGSRKPDGAIYTVGSPID  
 YGVIVDTKAYSGGYNLPIGQADEMORYVKENQTRNKHINPNNEWKVPSSVTEFKFLFV  
 SGHFKGNYKAQLTRLNRKTNCNGAVLSVEELLIGGEMIKAGTLTLLEEVRRKFNNGEINF\*

**Table S1: TALE FLASH IDs and RVDs targeting the promoter of *HBB* gene**

|                               |            |             |             |             |            |                 |
|-------------------------------|------------|-------------|-------------|-------------|------------|-----------------|
| <b>Plasmids<br/>Left Arm</b>  | <b>374</b> | <b>53</b>   | <b>125</b>  | <b>134</b>  | <b>325</b> | <b>Backbone</b> |
| RVDs                          | HD         | NI NG HD NI | HD NG NG NI | NN NI HD HD | NG HD NI   | HD              |
| <b>Plasmids<br/>Right Arm</b> | <b>373</b> | <b>144</b>  | <b>166</b>  | <b>6</b>    | <b>301</b> | <b>Backbone</b> |
| RVDs                          | NI         | NN NI NG NG | NN NN HD HD | NI NI HD HD | HD NG NI   | NN              |

**Table S2: Details of ssODNs (sequence, symmetry and length of homology arms)**

| Name  | Sequence (5' ..... <i>GCTAGC</i> ( <i>NheI</i> tag)..... 3')                                                                                                                           | Symmetry   | Homology       |
|-------|----------------------------------------------------------------------------------------------------------------------------------------------------------------------------------------|------------|----------------|
| 1 TS  | AGACTCTGGGTTTCTGATAGGCACTGACTCTCTGCCTATT <b>GCTAGC</b> GGTCTATTTTCCCACCCTTAGGC<br>TGCTGGTGGTCTACCCTTGG                                                                                 | symmetric  | 43 bp + 43 bp  |
| 2 TS  | GAGACAGAGAAGACTCTTGGGTTTCTGATAGGCACTGACTCTCTGCCTATT <b>GCTAGC</b> GGTCTATTTTCCC<br>ACCCTTAGGCTGCTGGTGGTCTACCCTTGGACCCAGAGGT                                                            | symmetric  | 53 bp + 53 bp  |
| 3 TS  | TGGGCATGTGGAGACAGAGAAGACTCTTGGGTTTCTGATAGGCACTGACTCTCTGCCTATT <b>GCTAGC</b> GGTCT<br>ATTTTCCCACCCTTAGGCTGCTGGTGGTCTACCCTTGGACCCAGAGGTCTTTGAGTC                                         | symmetric  | 63 bp + 63 bp  |
| 4 TS  | CAATAGAAACTGGGCATGTGGAGACAGAGAAGACTCTTGGGTTTCTGATAGGCACTGACTCTCTGCCTATT<br><b>GCTAGC</b> GGTCTATTTTCCCACCCTTAGGCTGCTGGTGGTCTACCCTTGGACCCAGAGGTCTTTGAGTC<br>CTTTGGGGAT                  | symmetric  | 73 bp + 73 bp  |
| 5 TS  | AGACAGGTTTAAGGAGACCAATAGAACTGGGCATGTGGAGACAGAGAAGACTCTTGGGTTTCTGATAGGCACT<br>GACTCTCTGCCTATT <b>GCTAGC</b> GGTCTATTTTCCCACCCTTAGGCTGCTGGTGGTCTA                                        | symmetric  | 91 bp + 36 bp  |
| 6 TS  | ATAGAACTGGGCATGTGGAGACAGAGAAGACTCTTGGGTTTCTGATAGGCACTGACTCTCTGCCTATT<br><b>GCTAGC</b> GGTCTATTTTCCCACCCTTAGGCTGCTGGTGGTCTA                                                             | asymmetric | 71 bp + 36 bp  |
| 7 TS  | GGTGAGGCCCTGGGCAGGTTGGTATCAAGGTTACAAGACAGGTTTAAGGAGACCAATAGAACTGGGCATGTGG<br>AGACAGAGAAGACTCTTGGGTTTCTGATAGGCACTGACTCTCTGCCTATT <b>GCTAGC</b> GGTCTATTTTCCCAC<br>CCTTAGGCTGCTGGTGGTCTA | asymmetric | 126 bp + 36 bp |
| 8 TS  | CAGGTTGGTATCAAGGTTACAAGACAGGTTTAAGGAGACCAATAGAACTGGGCATGTGGAGACAGAGAAGACT<br>CTTGGGTTTCTGATAGGCACTGACTCTCTGCCTATT <b>GCTAGC</b> GGTCTATTTTCCCACCCTTAGGCTGCTG<br>GTGGTCTACCCTTGGAC      | asymmetric | 112 bp + 45 bp |
| 9 TS  | AGACAGGTTTAAGGAGACCAATAGAACTGGGCATGTGGAGACAGAGAAGACTCTTGGGTTTCTGATAGGCACT<br>GACTCTCTGCCTATT <b>GCCTAGCTTTGGCCGTAGG</b> TCTATTTTCCCACCCTTAGGCTGCTGGTGGTCTA                             | asymmetric | 93 bp + 46 bp  |
| 1 NTS | AGACTCTGGGTTTCTGATAGGCACTGACTCTCTGCCTATT <b>GCTAGC</b> GGTCTATTTTCCCACCCTTAGGCTGCTGGTG<br>GTCTACCCTTGG                                                                                 | symmetric  | 43 bp + 43 bp  |
| 2 NTS | GAGACAGAGAAGACTCTTGGGTTTCTGATAGGCACTGACTCTCTGCCTATT <b>GCTAGC</b> GGTCTATTTTCCCACCCTTAG<br>GCTGCTGGTGGTCTACCCTTGGACCCAGAGGT                                                            | symmetric  | 53 bp + 53 bp  |
| 3 NTS | TGGGCATGTGGAGACAGAGAAGACTCTTGGGTTTCTGATAGGCACTGACTCTCTGCCTATT <b>GCTAGC</b> GGTCTATTTT<br>CCACCCTTAGGCTGCTGGTGGTCTACCCTTGGACCCAGAGGTCTTTGAGTC                                          | symmetric  | 63 bp + 63 bp  |
| 4 NTS | CAATAGAACTGGGCATGTGGAGACAGAGAAGACTCTTGGGTTTCTGATAGGCACTGACTCTCTGCCTATT <b>GCTAGCG</b><br>GTCTATTTTCCCACCCTTAGGCTGCTGGTGGTCTACCCTTGGACCCAGAGGTCTTTGAGTCCTTTGGGGAT                       | symmetric  | 73 bp + 73 bp  |
| 5 NTS | AGACAGGTTTAAGGAGACCAATAGAACTGGGCATGTGGAGACAGAGAAGACTCTTGGGTTTCTGATAGGCACTGACTCT<br>CTCTGCCTATT <b>GCTAGC</b> GGTCTATTTTCCCACCCTTAGGCTGCTGGTGGTCTA                                      | symmetric  | 91 bp + 36 bp  |
| 6 NTS | ATAGAACTGGGCATGTGGAGACAGAGAAGACTCTTGGGTTTCTGATAGGCACTGACTCTCTGCCTATT <b>GCTAGCGGT</b><br>CTATTTTCCCACCCTTAGGCTGCTGGTGGTCTA                                                             | asymmetric | 71 bp + 36 bp  |

|                       |                                                                                                                                                                                           |            |                                          |
|-----------------------|-------------------------------------------------------------------------------------------------------------------------------------------------------------------------------------------|------------|------------------------------------------|
| <b>7 NTS</b>          | GGTGAGGCCCTGGGCAGGTTGGTATCAAGGTTACAAGACAGGTTTAAGGAGACCAATAGAAACTGGGCATGTGGAGACAG<br>AGAAGACTCTTGGGTTTCTGATAGGCACTGACTCTCTCTGCCTATT <b>GCTAGCGG</b> TCTATTTTCCCACCCTTAGGCTGCTG<br>GTGGTCTA | asymmetric | 126 bp + 36 bp                           |
| <b>8 NTS</b>          | CAGGTTGGTATCAAGGTTACAAGACAGGTTTAAGGAGACCAATAGAAACTGGGCATGTGGAGACAGAGAAGACTCTTGGG<br>TTTCTGATAGGCACTGACTCTCTCTGCCTATT <b>GCTAGCGG</b> TCTATTTTCCCACCCTTAGGCTGCTGGTGGTCTACCCTTG<br>GAC      | asymmetric | 112 bp + 45 bp                           |
| <b>9 NTS</b>          | AGACAGGTTTAAGGAGACCAATAGAAACTGGGCATGTGGAGACAGAGAAGACTCTTGGGTTTCTGATAGGCACTGACTCT<br>CTCTGCCTATTGC <b>GCTAGC</b> TTTGGCCGTAGGCTCTATTTTCCCACCCTTAGGCTGCTGGTGGTCTA                           | asymmetric | 93 bp + 46 bp                            |
| <b>10 NTS</b>         | AGACAGGTTTAAGGAGACCAATAGAAACTGGGCATGTGGAGACAGAGAAGACTCTTGGGTTTCTGATAGGCACTGACTCT<br>CTCTG <b>AGA</b> ATT <b>GCTAGC</b> GGTCTATTTTCCCACCCTTAGGCTGCTGGTGGTCTA                               | asymmetric | 91 bp + 36 bp<br>PAM-depleted            |
| <b>11 NTS</b>         | AGACTCTTGGGTTTCTGATAGGCACTGACTCTCTCT <b>AGA</b> AATT <b>GCTAGC</b> GGTCTATTTTCCCACCCTTAGGCTGCTGGTG<br>GTCTACCCTTGG                                                                        | symmetric  | 43 bp + 43 bp<br>PAM-depleted            |
| <b>mod.<br/>ssODN</b> | (*T) (*G) (*G)GCATGTGGAGACAGAGAAGACTCTTGGGTTTCTGATAGGCACTGACTCTCTCTGCCTATT <b>GCTAGCGG</b><br>TCTATTTTCCCACCCTTAGGCTGCTGGTGGTCTACCCTTGGACCCAGAGGTTCTTTGA (*G) (*T) (*C)                   | symmetric  | 63 bp + 63 bp<br>chemically<br>modified. |

**Table S3 Barcode and sample details of next-generation sequencing**

| S. No. | Name       | <i>NheI</i> | Barcode        |
|--------|------------|-------------|----------------|
| 1.     | Control    | No          | Not present    |
| 2      | 5 TS       | Yes         | ATCACG/ CGTGAT |
| 3      | 10 NTS     | Yes         | CTTGTA/ TACAAG |
| 4      | 11 NTS     | Yes         | TGACCA/ TGGTCA |
| 5      | mod. ssODN | Yes         | ACATGT/ ACATGT |

**>Reference sequence of NGS (167 bp)**

AGAAACTGGGCATGTGGAGACAGAGAAGACTCTTGGGTTTCTGATAGGCACTGACTCTCTCTGCCTATT**|**GGTCTATTTT  
CCCACCCTTAGGCTGCTGGTGGTCTACCCTTGGACCCAGAGGTTCTTTGAGTCCTTTGGGGATCTGTCCACTCCTGATGC  
TGTTATGG

**|** Cut site

**Table S4: Details of off-target position, primer details and Indels frequency.**

| Sites         | Sequence                | Primers (5'...3')                                           | Intron/Exon (gene) | Locus           | Indel Frequency (T7E1 Assay) |
|---------------|-------------------------|-------------------------------------------------------------|--------------------|-----------------|------------------------------|
| HBB IVS-I 110 | GGGTGGGAAAATAGACCAATAGG | For: GGGTTTGAAGTCCAACCTCCTAA<br>Rev: AGAAAACATCAAGCGTCCCATA | Intron             | chr11:+5226803  | 44±18%                       |
| OT-1          | TAGTGGAAAAATAGACCAATGGG | For: CTACGTCTGCTGAAACCACA<br>Rev: AATTCAGGGCATCAGGACA       | Intron             | chr1:+81738787  | 0%                           |
| OT-2          | ATGTGGGAAAATCGACCAATCAG | For: AAGCCAAGCAGAAAACCACAG<br>Rev: CTGGGCTAATGGGAAGGGAT     | Intron             | chr3:-6513388   | 0%                           |
| OT-3          | AGATGGGAAAATAGACTAATGGG | For: CTCTCACCTGAACCACACT<br>Rev: AGCAAAGATGAGCCATGCAG       | Intron             | chr13:-78904261 | 0%                           |
| OT-4          | TGGAAGGAAAACAGACCAAGAAG | For: GAGGTCCTTGGAGATTGGCT<br>Rev: AGCCCCTGTCTAATGGTCAC      | Exon (NM_024776)   | chr15:-77425989 | 0%                           |
| OT-5          | GGGAGGGATCAAGACCAATAAG  | For: GGTGGCAAAATGGAGCTGAT<br>Rev: GCCATGCTCAACTACTGCTC      | Exon (NM_030581)   | chr16:+74976589 | 0%                           |
| OT-6          | GAGTGGGAAAACAGACCAGTAGG | For: TTCCTTCTGTGGGGTCTTC<br>Rev: TCAGAACTCAGGGTGCAGAG       | Exon (NM_032878)   | chr19:+36503885 | 0%                           |
